# Supplementary material for: Characterization of Maternal Circulating MicroRNAs in Obese Pregnancies and Gestational Diabetes Mellitus
Source: MDPI journal article supplement (doi:10.3390/antiox12020515), 2023-02-17
Supplement: s1 [file s1]

**Supplementary Table S1** | Results of the union analysis performed with DIANA-miRPath v.3

| <b>Pathway Enrichment Analysis results (DIANA-miRPath):</b>                                                                                                                                                                                                                                                                                                                                                                                                                                                                                                                                                                                                                                                                                                                                                                                                                                                                                                                                                                                                                                                                                                                                                                                                                                                                                                                                                                                         |                                                                                                                                                                                                                                                                                                                                                                                                                                                                                                                                                                                                                                                                                                                                                 |                                                                                                                                                                                                                                                                                                                                                                                                                                                                                                                                                                                                                                                                                                                                                                                                                                                                                                                                                                                                                                                                                                                                                                                                                                                                                                                                                                                                                                                                                          |
|-----------------------------------------------------------------------------------------------------------------------------------------------------------------------------------------------------------------------------------------------------------------------------------------------------------------------------------------------------------------------------------------------------------------------------------------------------------------------------------------------------------------------------------------------------------------------------------------------------------------------------------------------------------------------------------------------------------------------------------------------------------------------------------------------------------------------------------------------------------------------------------------------------------------------------------------------------------------------------------------------------------------------------------------------------------------------------------------------------------------------------------------------------------------------------------------------------------------------------------------------------------------------------------------------------------------------------------------------------------------------------------------------------------------------------------------------------|-------------------------------------------------------------------------------------------------------------------------------------------------------------------------------------------------------------------------------------------------------------------------------------------------------------------------------------------------------------------------------------------------------------------------------------------------------------------------------------------------------------------------------------------------------------------------------------------------------------------------------------------------------------------------------------------------------------------------------------------------|------------------------------------------------------------------------------------------------------------------------------------------------------------------------------------------------------------------------------------------------------------------------------------------------------------------------------------------------------------------------------------------------------------------------------------------------------------------------------------------------------------------------------------------------------------------------------------------------------------------------------------------------------------------------------------------------------------------------------------------------------------------------------------------------------------------------------------------------------------------------------------------------------------------------------------------------------------------------------------------------------------------------------------------------------------------------------------------------------------------------------------------------------------------------------------------------------------------------------------------------------------------------------------------------------------------------------------------------------------------------------------------------------------------------------------------------------------------------------------------|
| <b>A) OB/GDM(-) vs NW</b>                                                                                                                                                                                                                                                                                                                                                                                                                                                                                                                                                                                                                                                                                                                                                                                                                                                                                                                                                                                                                                                                                                                                                                                                                                                                                                                                                                                                                           | <b>B) OB/GDM(+) vs NW</b>                                                                                                                                                                                                                                                                                                                                                                                                                                                                                                                                                                                                                                                                                                                       | <b>C) OB/GDM(+) vs OB/GDM(-)</b>                                                                                                                                                                                                                                                                                                                                                                                                                                                                                                                                                                                                                                                                                                                                                                                                                                                                                                                                                                                                                                                                                                                                                                                                                                                                                                                                                                                                                                                         |
| <ol style="list-style-type: none"> <li>1. Prion diseases</li> <li>2. Viral carcinogenesis</li> <li>3. Hippo signalling pathway</li> <li><b>4. Fatty acid biosynthesis</b></li> <li><b>5. ECM-receptor interaction</b></li> <li>6. Protein processing in endoplasmic reticulum</li> <li>7. Proteoglycans in cancer</li> <li>8. Adherens junction</li> <li>9. Bacterial invasion of epithelial cells</li> <li><b>10. AMPK signalling pathway</b></li> <li>11. Chronic myeloid leukemia</li> <li><b>12. TGF-beta signalling pathway</b></li> <li><b>13. Lysine degradation</b></li> <li>14. Mucin type O-Glycan biosynthesis</li> <li>15. Cell cycle</li> <li>16. p53 signalling pathway</li> <li><b>17. Oocyte meiosis</b></li> <li>18. Glioma</li> <li>19. Neurotrophin signalling pathway</li> <li>20. Thyroid cancer</li> <li><b>21. Thyroid hormone signalling pathway</b></li> <li><b>22. FoxO signalling pathway</b></li> <li>23. Colorectal cancer</li> <li>24. Pathways in cancer</li> <li>25. Prostate cancer</li> <li>26. Transcriptional misregulation in cancer</li> <li>27. Axon guidance</li> <li>28. Renal cell carcinoma</li> <li>29. Shigellosis</li> <li>30. Focal adhesion</li> <li>31. Hepatitis B</li> <li><b>32. Signalling pathways regulating pluripotency of stem cells</b></li> <li>33. Endometrial cancer</li> <li><b>34. Progesterone-mediated oocyte maturation</b></li> <li><b>35. Vitamin B6 metabolism</b></li> </ol> | <ol style="list-style-type: none"> <li><b>1. Fatty acid elongation</b></li> <li><b>2. Fatty acid degradation</b></li> <li><b>3. Lysine degradation</b></li> <li><b>4. Fatty acid metabolism</b></li> <li><b>5. Signalling pathways regulating pluripotency of stem cells</b></li> <li><b>6. TGF-beta signalling pathway</b></li> <li><b>7. FoxO signalling pathway</b></li> <li><b>8. Valine, leucine and isoleucine degradation</b></li> <li>9. Bacterial invasion of epithelial cells</li> <li><b>10. HIF-1 signalling pathway</b></li> <li>11. RNA transport</li> <li>12. Ubiquitin mediated proteolysis</li> <li>13. Glioma</li> <li>14. Proteoglycans in cancer</li> <li><b>15. Valine, leucine and isoleucine biosynthesis</b></li> </ol> | <ol style="list-style-type: none"> <li><b>1. Fatty acid biosynthesis</b></li> <li><b>2. ECM-receptor interaction</b></li> <li>3. Prion diseases</li> <li>4. Viral carcinogenesis</li> <li>5. Hippo signalling pathway</li> <li><b>6. Lysine degradation</b></li> <li>7. Proteoglycans in cancer</li> <li>8. Cell cycle</li> <li>9. Adherens junction</li> <li>10. Chronic myeloid leukemia</li> <li><b>11. TGF-beta signalling pathway</b></li> <li>12. Hepatitis B</li> <li>13. Glioma</li> <li>14. p53 signalling pathway</li> <li><b>15. FoxO signalling pathway</b></li> <li><b>16. Thyroid hormone signalling pathway</b></li> <li>17. Protein processing in endoplasmic reticulum</li> <li>18. Bacterial invasion of epithelial cells</li> <li><b>19. Fatty acid metabolism</b></li> <li>20. Pathways in cancer</li> <li>21. Endocytosis</li> <li>22. Colorectal cancer</li> <li><b>23. Oocyte meiosis</b></li> <li>24. Thyroid cancer</li> <li>25. Transcriptional misregulation in cancer</li> <li>26. Prostate cancer</li> <li>27. Epstein-Barr virus infection</li> <li>28. Small cell lung cancer</li> <li>29. Mucin type O-Glycan biosynthesis</li> <li><b>30. AMPK signalling pathway</b></li> <li>31. MAPK signalling pathway</li> <li>32. Pancreatic cancer</li> <li>33. Neurotrophin signalling pathway</li> <li>34. Melanoma</li> <li>35. Renal cell carcinoma</li> <li>36. Endometrial cancer</li> <li>37. Steroid biosynthesis</li> <li>38. Bladder cancer</li> </ol> |

All listed pathways resulted significantly associated (force of association:  $p$ -value  $< 0.05$ ) with the related miRNAs' cluster, for each comparison **A)** OB/GDM(-) vs NW, **B)** OB/GDM(+) vs NW, **C)** OB/GDM(+) vs OB/GDM(-) (refer to Table 2 for the miRNA clusters). Pathways are ordered by descending statistical significance,  $p$ -values not showed. Pathways considered to be the most interesting ones according to the context of maternal obesity, GDM, pregnancy, inflammation have been marked with bold font.
